# Supplementary material for: Facile synthesis of highly emissive carbon dots from pyrolysis of glycerol; gram scale production of carbon dots/mSiO2 for cell imaging and drug release
Source: Royal Society of Chemistry journal article supplement (doi:10.1039/c2jm32206d), 2012-01-01
Supplement: c2jm32206d.pdf [file c2jm32206d.pdf]

# Supporting Information

## Facile Synthesis of Highly Emissive Carbon Dots from Pyrolysis of Glycerol; Gram Scale Production of Carbon Dots/mSiO<sub>2</sub> for Cell Imaging and Drug Release

*Chih-Wei Lai, Yi-Hsuan Hsiao, and Pi-Tai Chou\**

Department of Chemistry, National Taiwan University, Taipei 106, Taiwan

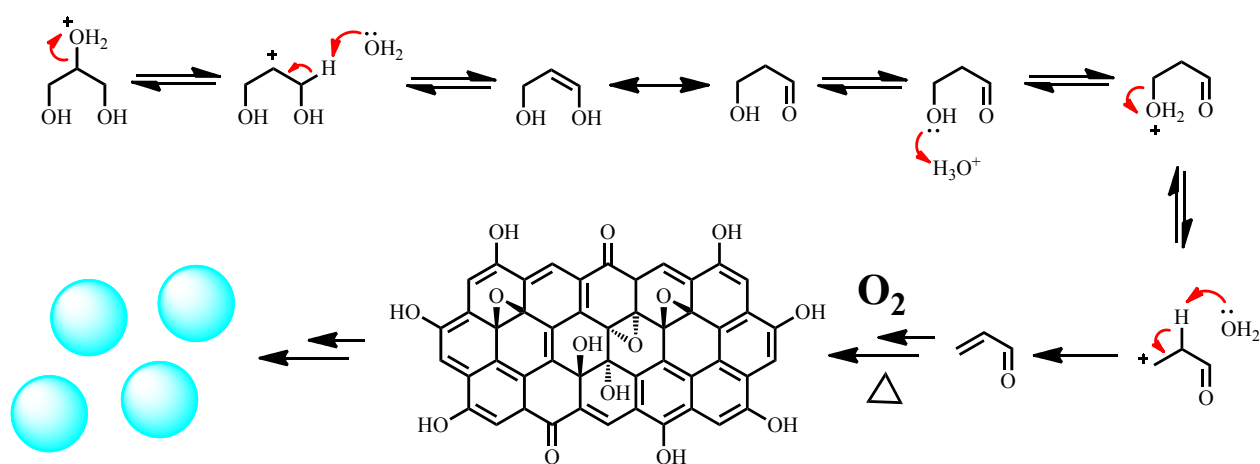

Scheme S1: A proposed mechanism of CDs NPs formation in the refluxing glycerol solvent under 1 atmosphere air pressure.

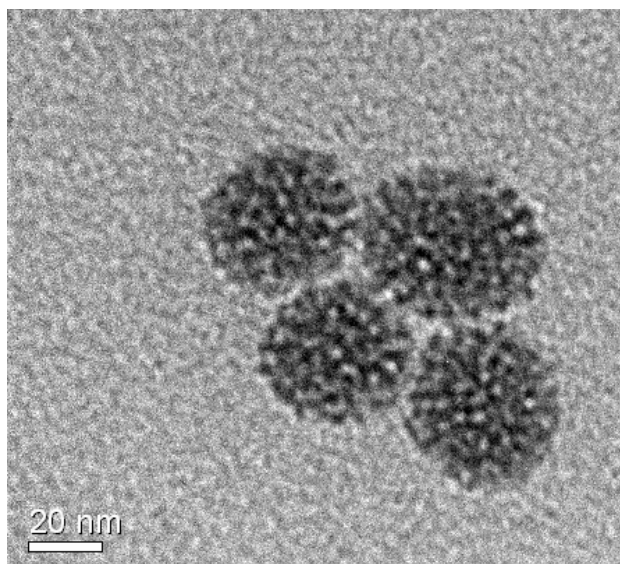

Figure S1. The TEM image of the mesoporous silica nanoparticles

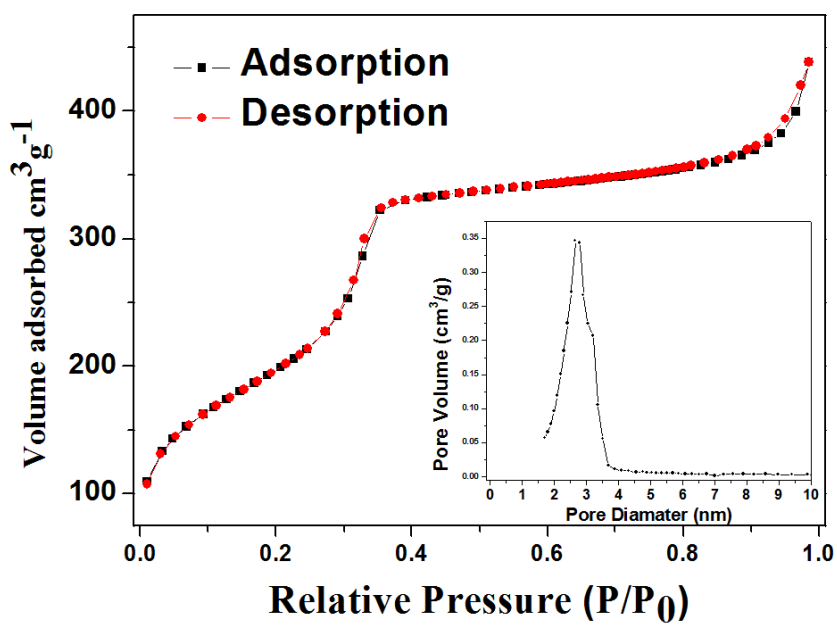

Figure S2. N<sub>2</sub> adsorption-desorption isotherm of the as-synthesized CDs@mSiO<sub>2</sub>-PEG nanoparticles; the insertion is the pore size distribution.

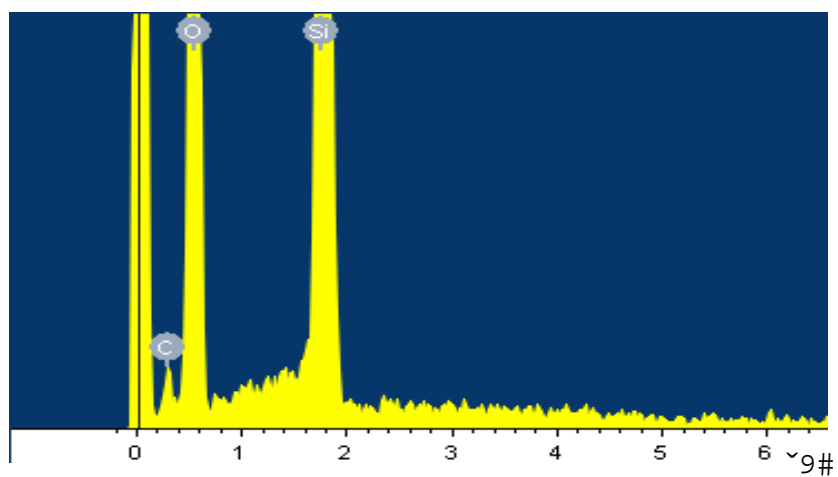

Figure S3. EDX spectra of CDs@mSiO<sub>2</sub>-PEG

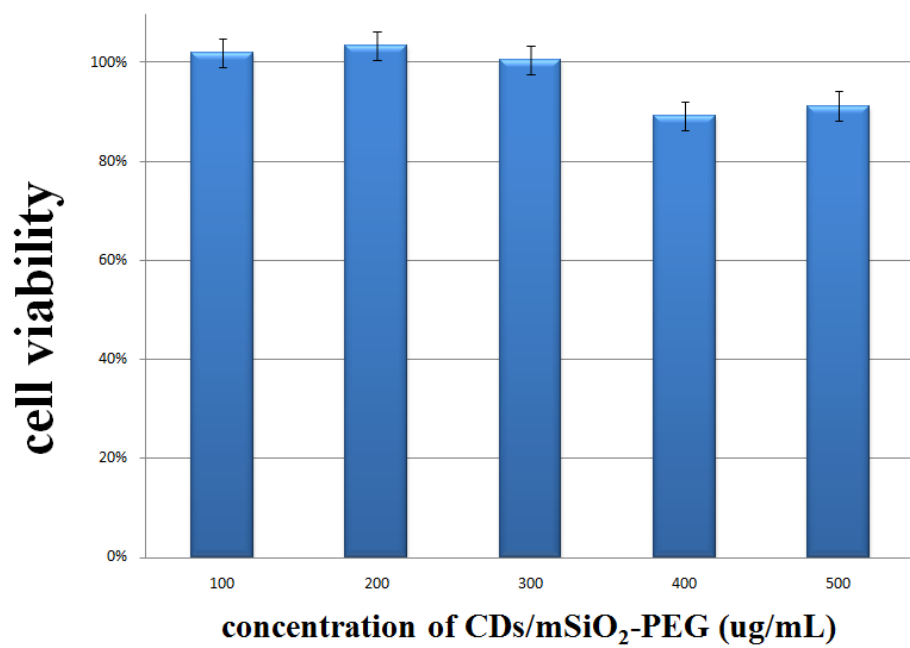

Figure S4. MTT assay of CDs@mSiO<sub>2</sub>-PEG nanoparticles after 48 hr treatment.
